# Supplementary material for: CD4+ tumor-infiltrating lymphocytes secreting T cell-engagers induce regression of autologous patient-derived non-small cell lung cancer xenografts
Source: PubMed Central journal article supplement — Oncoimmunology. 2024 Aug 27;13(1):2392897. doi: 10.1080/2162402X.2024.2392897 (PMC11352715; doi:10.1080/2162402x.2024.2392897), 2024-08-27
Supplement: KONI_A_2392897_SM3027.pdf [file KONI_A_2392897_SM3027.pdf]

**CD4<sup>+</sup> tumor-infiltrating lymphocytes secreting T cell-engagers induce  
regression of autologous patient-derived non-small cell lung cancer  
xenografts**

Anaïs Jiménez-Reinoso\*, Magdalena Molero-Abraham, Cristina Cirauqui, Belén Blanco,  
Eva M. Garrido-Martin, Daniel Nehme-Álvarez, Carmen Domínguez-Alonso, Ángel  
Ramírez-Fernández, Laura Díez-Alonso, Ángel Nuñez-Buiza, África González-Murillo,  
Raquel Tobes, Eduardo Pareja, Manuel Ramírez-Orellana, José L. Rodríguez-Peralto,  
Irene Ferrer, Jon Zugazagoitia, Luis Paz-Ares, Luis Álvarez-Vallina\*

\*Corresponding authors: [a.jimenez.imas12@h12o.es](mailto:a.jimenez.imas12@h12o.es), [lalvarezv@ext.cnio.es](mailto:lalvarezv@ext.cnio.es)

This Inventory includes:

- **List of Abbreviations**
- **Supplementary Figures**
- **Supplementary Tables**

## LIST OF ABBREVIATIONS

**ACT:** Adoptive cell therapy

**CM:** central memory

**CR:** complete responses

**DCM:** DMEM complete medium

**DN:** double negative

**DP:** double positive

**DSP:** digital spatial profiling

**E:T:** Effector:target ratio

**EBV:** Epstein-Barr virus

**EGFP:** Enhanced green fluorescent protein

**EGFR LiTE:** anti-EGFR x anti-CD3 light T cell engager

**EGFR:** epidermal growth factor receptor

**ELISA:** enzyme-linked immunosorbent assays

**EM:** effector memory

**EMRA:** effector memory re-expressing CD45RA

**FC:** fold change

**FDR:** false discovery rate

**FFPE:** formalin-fixed and paraffin-embedded

**GZMB:** granzyme B

**H/E:** hematoxylin and eosin.

**hIL-2 NOG mice:** NOD.Cg-*Prkdc*<sup>scid</sup> *Il2rg*<sup>tm1Sug</sup> Tg(CMV-IL2)4-2Jic/JicTac

**IHC:** immunohistochemistry

**IL-2:** Interleukin-2

**KO:** knock out

**M:** mouse.

**NGS:** next-generation sequencing

**NRTs:** neoantigen reactive T cells

**NSCLC:** non-small cell lung cancer

**NTd:** Non-transduced

**P1:** Patient 1

**P2:** Patient 2

**PDX:** Patient-derived xenograft

**RCM:** RPMI complete medium

**REP:** rapid expansion protocol.

**rhIL-2:** recombinant human IL-2

**ROI:** regions of interest

**scFv:** single-chain variable fragment

**SD:** standard deviation

**SEM:** standard error of mean

**STAb:** Secreting T cell-engaging antibodies

**TAA:** tumor-associated antigen

**TCE:** T cell-engagers

**TCR:** T cell receptor

**TME:** tumor microenvironment

**TIL:** tumor-infiltrating lymphocytes

**Veh.:** vehicle

# SUPPLEMENTARY FIGURES

## Supplementary Figure S1

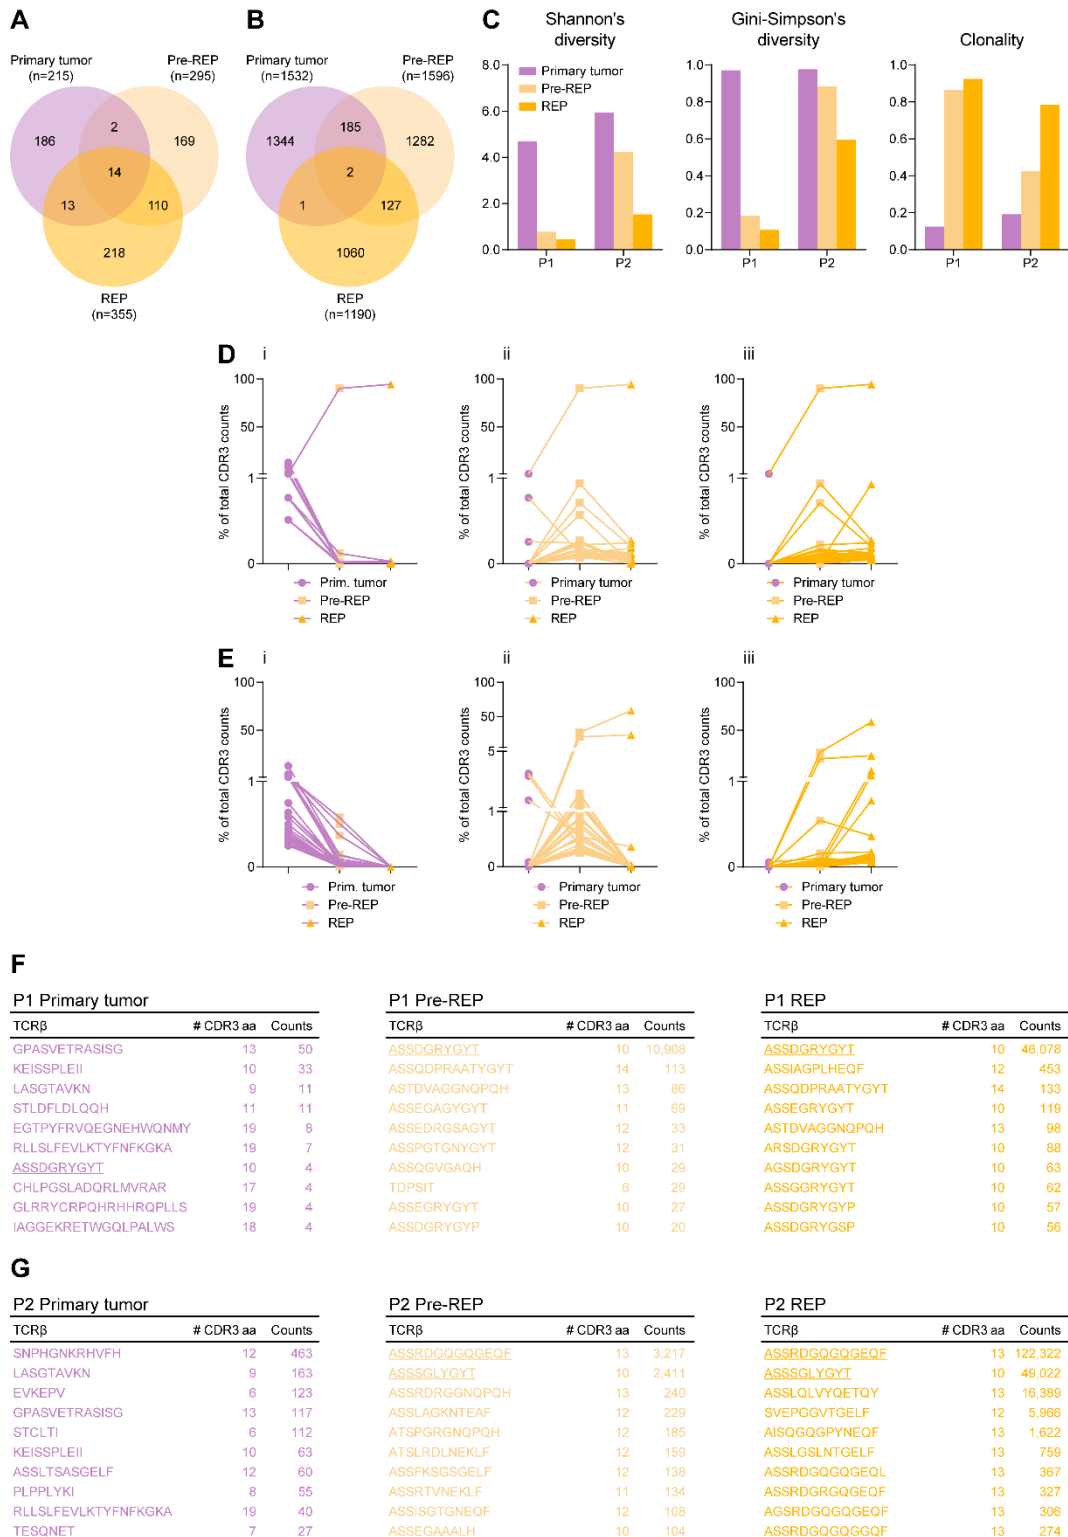

**Figure S1. TCRβ clonotypes metrics and clonal dynamics during *ex vivo* TIL expansion.** (A, B) Shared clonotypes between primary tumors, pre- and post-REP TIL cultures from NSCLC P1 (A) and P2 (B). (C) NSCLC P1 and P2 TCR Shannon's and Gini-Simpson's diversity scores, and TCR clonality scores in primary tumors and in pre-

and post-REP TIL cultures, calculated from total number of productive clonotypes with amino acid-length between 5-20. **(D, E)** Relative frequency of the TOP-30 largest clones of the primary tumor (i), the pre-REP (ii) or the post-REP (iii) CDR3 repertoire of samples from NSCLC P1 **(D)** and P2 **(E)**. **(F, G)** Detailed amino acid sequences of the TOP-10 largest clones of the primary tumor, the Pre-REP or the Post-REP CDR3 repertoire of samples from NSCLC P1 **(F)** and P2 **(G)**. P1, Patient 1; P2, Patient 2; REP, rapid expansion protocol.

## Supplementary Figure S2

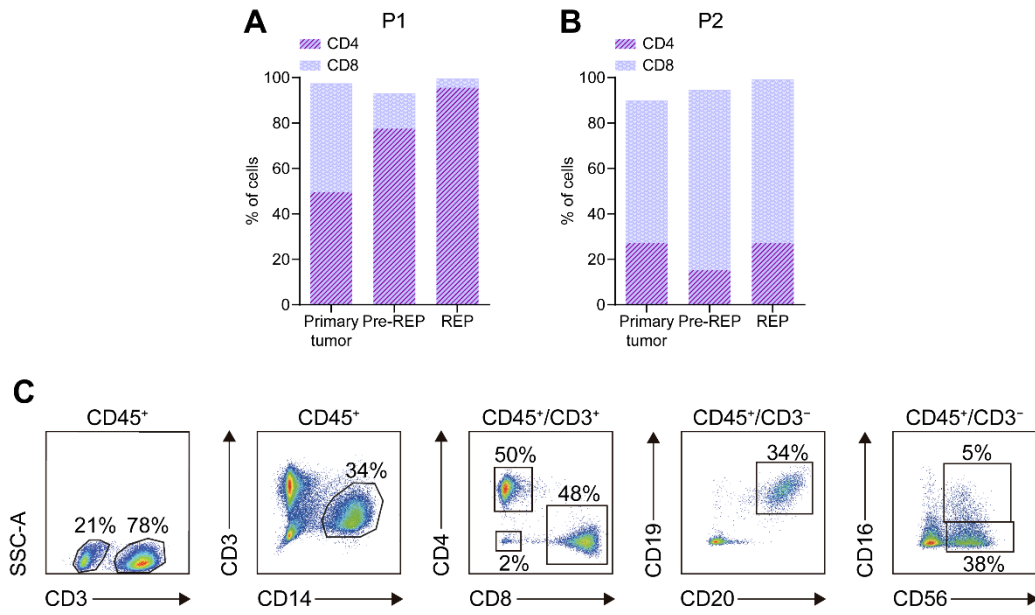

**Figure S2. Immune microenvironment phenotype in NSCLC patients.** (A, B) Percentages of CD4<sup>+</sup> and CD8<sup>+</sup> T cells from NSCLC P1 (A) and P2 (B). (C) Percentages of total T (CD3<sup>+</sup>), non-T (CD3<sup>-</sup>), macrophages (CD3<sup>-</sup>CD14<sup>+</sup>), CD4<sup>+</sup> and CD8<sup>+</sup> T cells, B cells (CD19<sup>+</sup>CD20<sup>+</sup>) and NK cells (CD56<sup>+</sup>CD16<sup>+/-</sup>) within leukocytes (CD45<sup>+</sup>) after P1 primary tumor disaggregation.

## Supplementary Figure S3

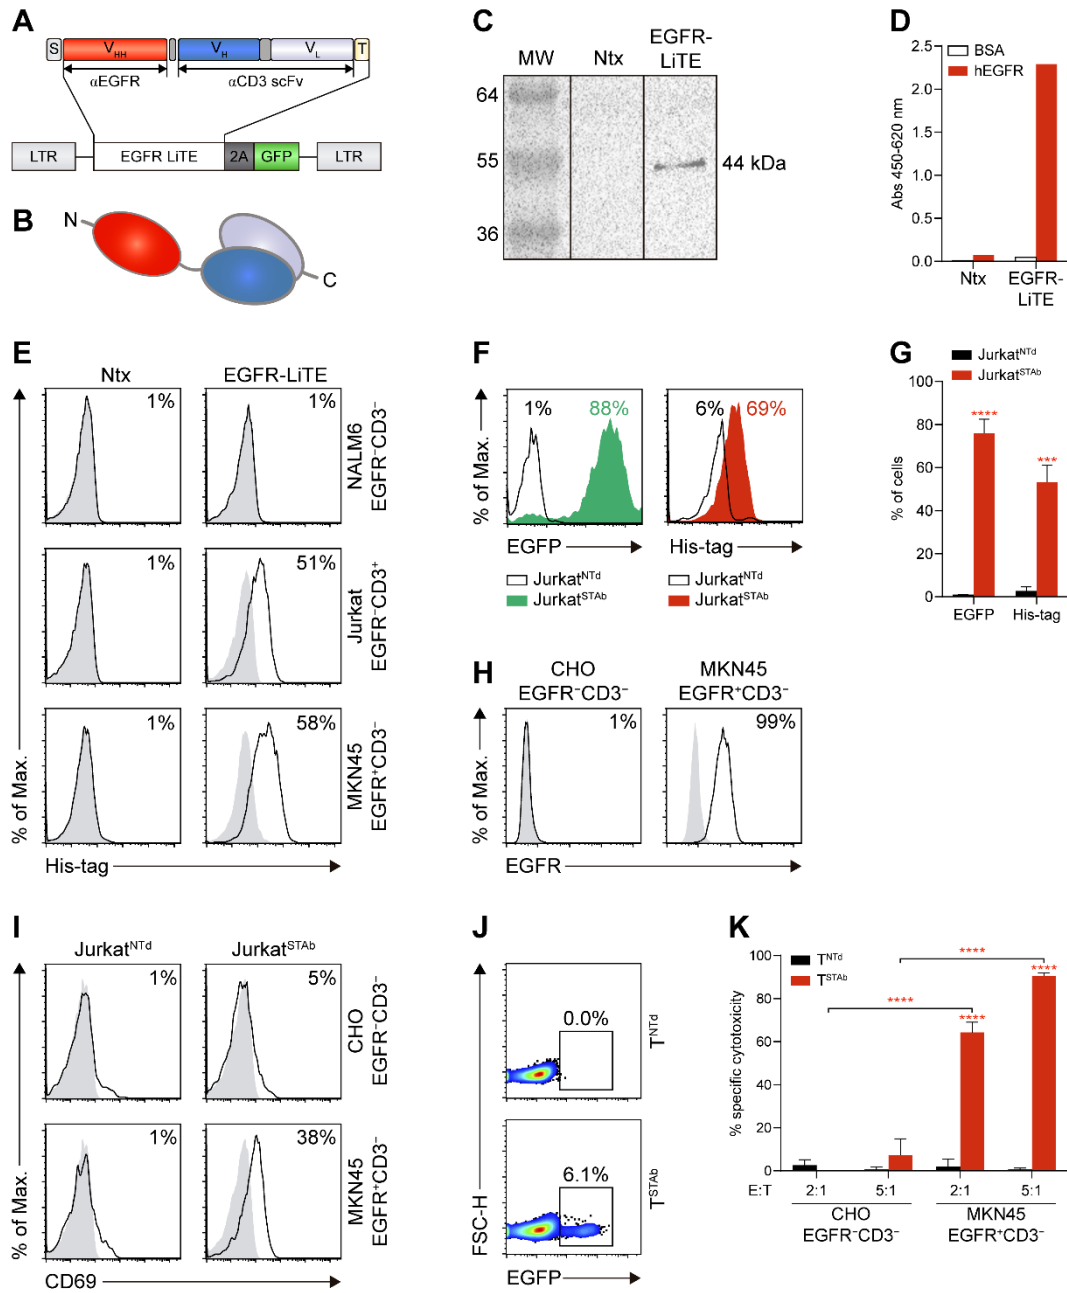

**Figure S3. Functionality of secreted anti-EGFR light T cell engagers (LiTE).** (A, B) Schematic diagrams showing the genetic (A) and domain structure (B) of the anti-EGFR x anti-CD3 Light T cell engager (EGFR LiTE) bearing the OncoM signal peptide (S, grey box), the anti-EGFR V<sub>HH</sub> gene (red box), the anti-CD3 scFv gene (blue boxes), and the Myc and His tags (light yellow box). The EGFR LiTE construct was cloned into a pCCL lentiviral-based backbone containing a T2A-EGFP cassette (A). (C, D) Detection of soluble secreted EGFR LiTE in the conditioned media from pCCL transfected HEK293T cells by Western blot (C) or ELISA (D). Conditioned media from non-transfected (NTx) cells was used as negative control. One representative experiment is shown. (E) Binding assays of conditioned media from NTx- or EGFR LiTE-transfected HEK293T cells to NALM6, Jurkat and MKN45 tumor cells. Specific binding was detected using anti-His-tag mAb and analyzed by flow cytometry. (F) Percentage of EGFP-positive (left) and

EGFR-LiTE decorated (right) engineered EGFR-STAb Jurkat (Jurkat<sup>STAb</sup>) in comparison with non-transduced Jurkat cells (Jurkat<sup>NTd</sup>). EGFR-LiTE decoration was detected using anti-His-tag mAb and analyzed by flow cytometry. **(G)** EGFP expression and EGFR-LiTE decoration analysis in Jurkat<sup>NTd</sup> and Jurkat<sup>STAb</sup> cells. Data represent mean+SEM of at least 3 independent experiments, and statistical significance was calculated by two-way ANOVA test corrected by Sidak's multiple comparisons test; \*\*p < 0.01; \*\*\*p < 0.001. **(H)** Cell surface expression profile of EGFR from target cells used in *in vitro* studies by flow cytometry. **(I)** T cell activation assay. Jurkat<sup>NTd</sup> or Jurkat<sup>STAb</sup> cells were co-cultured at a 1:1 E:T ratio with EGFR-negative (CHO) or EGFR-positive (MKN45) cells for 24 hours and CD69 expression analyzed by flow cytometry. **(J)** Percentage of EGFP-positive transduced primary T cells (T<sup>STAb</sup>) in comparison with non-transduced primary T cells (T<sup>NTd</sup>). **(K)** Specific cytotoxicity of T<sup>NTd</sup> or T<sup>STAb</sup> cells against EGFR-negative (CHO) or EGFR-positive (MKN45) cells at the indicated E:T ratios after 48 hours. The percentage of specific cytotoxicity was calculated by adding D-luciferin to detect bioluminescence. Data represent mean+SD and statistical significance was calculated by two-way ANOVA test corrected by Tukey's multiple comparisons test; \*\*\*\*p < 0.0001. The inset numbers in **(E-J)** represent the percentage of cells staining positive for the indicated marker. EGFP, enhanced green fluorescence protein; SEM, standard error of the mean; SD, standard deviation.



## Supplementary Figure S4

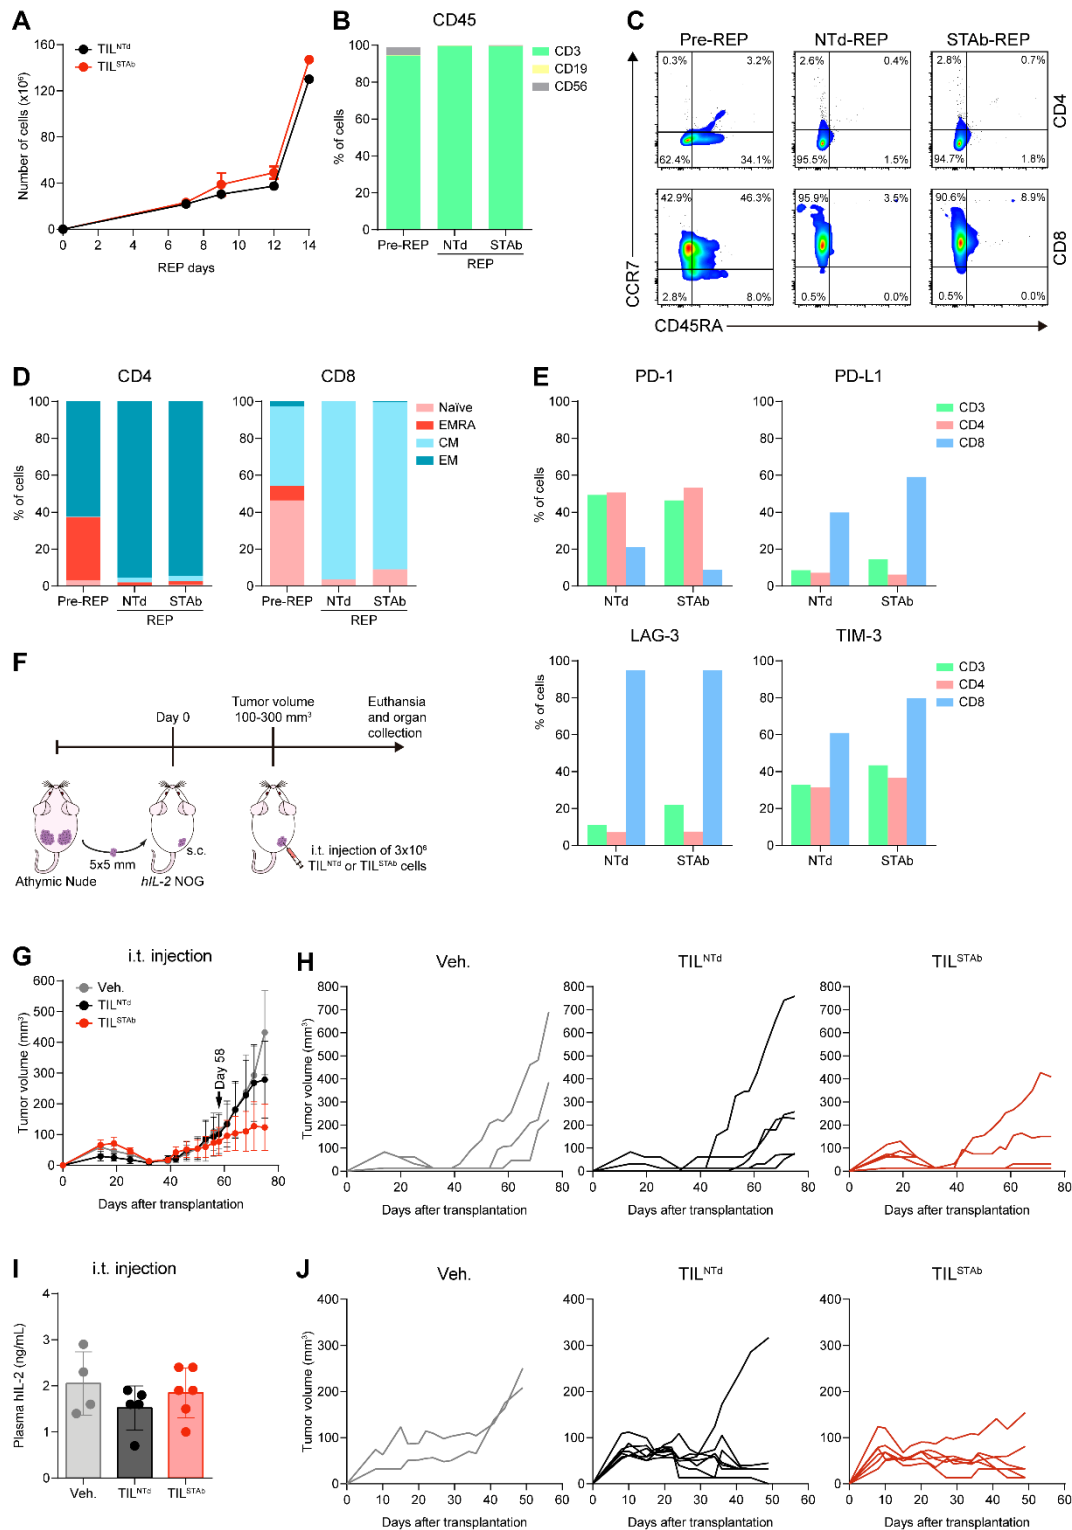

**Figure S4. Treatment of EGFR<sup>+</sup> NSCLC PDX mouse model with autologous engineered TCE-secreting TIL (cont.). (A)** Cell growth during the small-scale REP of non-transduced (TIL<sup>NTd</sup>) and EGFR-STAb TIL (TIL<sup>STAb</sup>). **(B)** Percentages of total T (CD45<sup>+</sup>CD3<sup>+</sup>), B (CD45<sup>+</sup>CD19<sup>+</sup>) and NK (CD45<sup>+</sup>CD56<sup>+</sup>) cells among Pre-REP TIL, TIL<sup>NTd</sup> REP and TIL<sup>STAb</sup> REP. **(C, D)** Plots **(C)** and graph bars **(D)** representing the percentages of naive, effector memory re-expressing CD45RA (EMRA), central memory

(CM), and effector (EM) CD4<sup>+</sup> or CD8<sup>+</sup> T cells among pre-REP, TIL<sup>NTd</sup> REP, and TIL<sup>STAb</sup> REP. (E) Exhaustion markers expression within total T, CD4 (CD3<sup>+</sup>CD4<sup>+</sup>) and CD8 (CD3<sup>+</sup>CD8<sup>+</sup>) cells after REP. (F) Experimental design of autologous PDX establishment. *hIL-2* NOG xenografted mice were intratumorally (i.t.) treated with 3×10<sup>6</sup> TIL<sup>NTd</sup> or TIL<sup>STAb</sup> cells when the average tumor volume reached approximately 100-300 mm<sup>3</sup>. After tumors reached the indicated size, thirteen mice were randomized into three groups (3/5/5) and i.t. treated with Veh. (PBS supplemented with 300 IU/mL rhIL-2, *n*=3 mice), TIL<sup>NTd</sup> (*n*=5 mice) or TIL<sup>STAb</sup> (*n*=5 mice) cells. Black arrow indicates the day of the injection. Tumors sizes were measured with calipers. (G, H) Tumor growth curves represented as mean±SEM (G) or as individual mouse curves within the different groups (H); black arrow indicates the day of the i.t. injection. (I) Human IL-2 plasma levels in mice after TIL treatment (mean±SD). Significance was calculated by two-way (G) or one-way (I) ANOVA test corrected by Tukey's multiple comparisons test; no significant differences were found. (J) Tumor growth curves represented as individual mouse curves within the different groups of *hIL-2* NOG xenografted mice intravenously (i.v.) treated with 7.5×10<sup>6</sup> TIL<sup>NTd</sup> or TIL<sup>STAb</sup> cells when the average tumor volume reached approximately 100-300 mm<sup>3</sup>. Veh., vehicle; SEM, standard error of mean; SD, standard deviation.

## Supplementary Figure S5

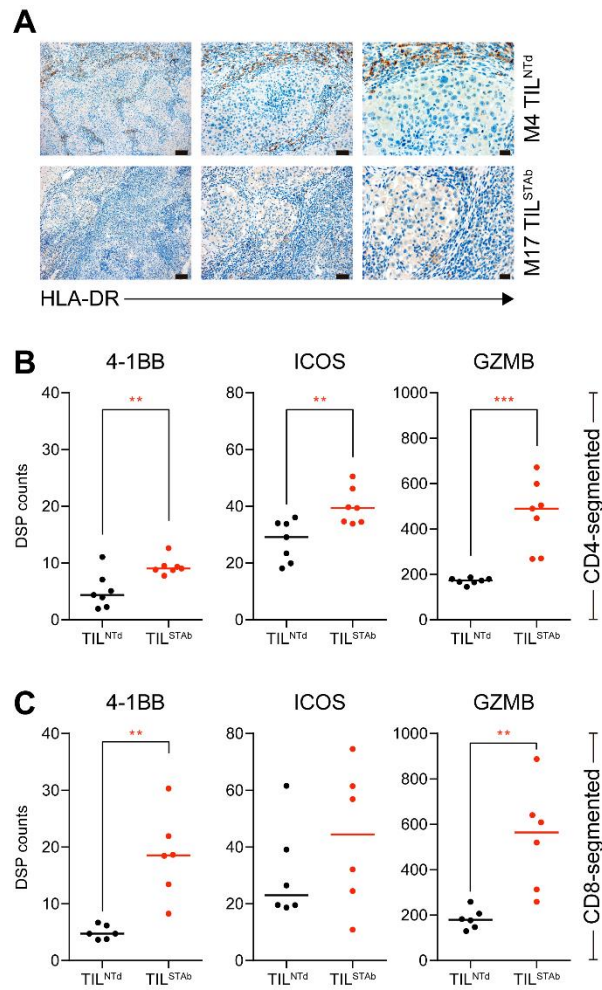

**Figure S5. Immunohistochemistry and DSP analysis of intravenously treated *hIL2* xenografted mouse 4 (TIL<sup>NTd</sup>-treated) and mouse 17 (TIL<sup>STAb</sup>-treated) (cont.).** (A) Expression of HLA-DR after treatment of *hIL2* NOG xenografted mouse 4 (M4) with TIL<sup>NTd</sup> or mouse 17 (M17) with TIL<sup>STAb</sup>. Scale bars: 100  $\mu$ m (left), 50  $\mu$ m (middle) and 20  $\mu$ m (right). (B) Comparative analysis of 4-1BB, ICOS, and GZMB levels measured by DSP in CD4 (B) or CD8 (C) compartments. Significance was calculated by an unpaired t-test. \*\*p < 0.01; \*\*\*p < 0.001. GZMB, granzyme B.

## Supplementary Figure S6

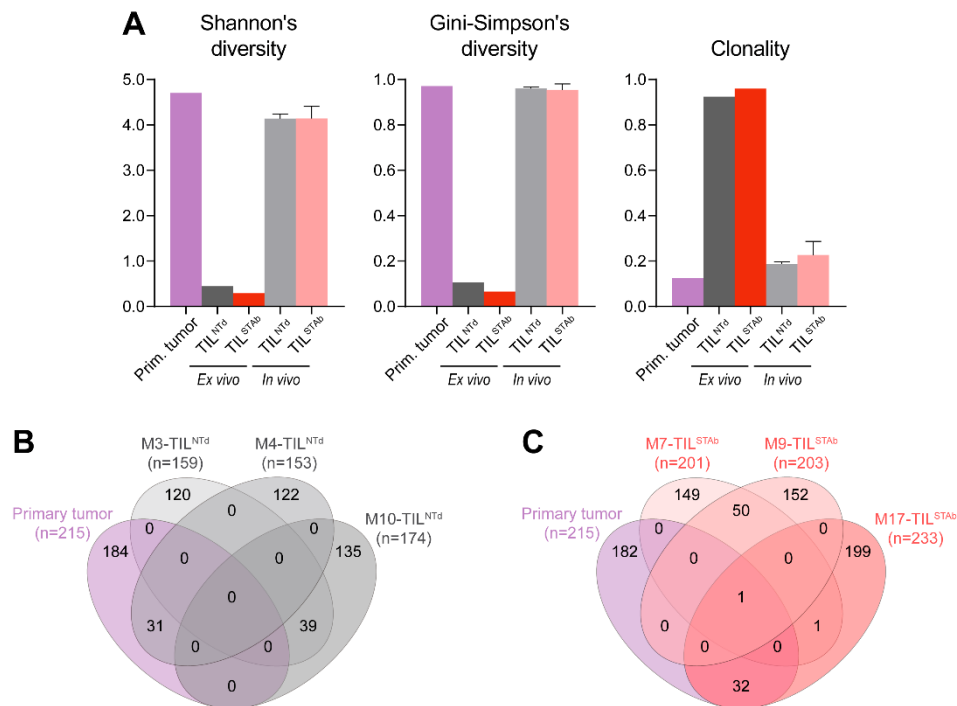

**Figure S6. TCR clonotypes composition of primary tumor and *in vivo* TIL-treated tumors from NSCLC P1.** (A) Shannon's and Gini-Simpson's diversity scores, and TCR clonality scores in primary tumor (Prim. Tumor), *ex vivo* expanded TIL and *in vivo* TIL-treated tumors. (B, C) Shared clonotypes between primary tumor and *in vivo* TIL<sup>NTd</sup>-treated (B) or TIL<sup>STAb</sup>-treated tumors (C). Data in (A-C) are calculated from total number of unique productive clonotypes with 5-20 amino acid length CDR3 of TCR $\beta$ .

## SUPPLEMENTARY TABLES

**Table S1. Antibodies**

| Antigen                               | Clone        | Host species /<br>clonality | Brand                        | Reference     | Application |
|---------------------------------------|--------------|-----------------------------|------------------------------|---------------|-------------|
| Anti-GFP                              | D5.1         | Rabbit monoclonal           | Cell Signaling<br>Technology | 2956          | IHC         |
| Anti-human CD3                        | LN10         | Mouse monoclonal            | Leica                        | CD3-565-L-CE  | IHC         |
| Anti-human CD3<br>FLEX-X              | –            | Rabbit Polyclonal           | Dako                         | IR503         | IHC         |
| Anti-human CD4                        | 4B12         | Mouse monoclonal            | Leica                        | CD4-368-L-CE  | IHC         |
| Anti-human CD8                        | 4B11         | Mouse monoclonal            | Leica                        | CD8-4B11-L-CE | IHC         |
| Anti-human CD31                       | JC70A        | Mouse monoclonal            | Leica                        | CD31-607-L-CE | IHC         |
| Anti-human CD31                       | EPR17259     | Rabbit monoclonal           | Abcam                        | ab182981      | IHC         |
| Anti-human EGFR                       | H11          | Mouse monoclonal            | Dako                         | M3563         | IHC         |
| Anti-human HLA-DR,<br>$\alpha$ -chain | TAL.1B5      | Mouse monoclonal            | Dako                         | M0746         | IHC         |
| Anti-human Perforin                   | 5B10         | Mouse monoclonal            | Invitrogen                   | MA512469      | IHC         |
| Anti-human FOXP3                      | 236A/E7      | Mouse monoclonal            | eBioscience                  | 14-4777-82    | IHC         |
| Anti-His APC                          | GG11-8F3.5.1 | Mouse monoclonal            | Miltenyi Biotec              | 130-119-782   | FC          |
| Anti-human CD3<br>V450                | UCHT1        | Mouse monoclonal            | BD Horizon                   | 560365        | FC          |
| Anti-human CD3 FITC                   | HIT3a        | Mouse monoclonal            | BD Pharmingen                | 561802        | FC          |
| Anti-human CD4<br>BUV395              | RPA-T4       | Mouse monoclonal            | BD Horizon                   | 564724        | FC          |
| Anti-human CD4<br>PerCP-Cy5.5         | SK3          | Mouse monoclonal            | BD                           | 332772        | FC          |
| Anti-human CD8<br>BUV563              | RPA-T8       | Mouse monoclonal            | BD Horizon                   | 565695        | FC          |
| Anti-human CD8<br>APC-Cy7             | SK1          | Mouse monoclonal            | BioLegend                    | 344714        | FC          |
| Anti-human CD14<br>BV605              | M5E2         | Mouse monoclonal            | BD Horizon                   | 564054        | FC          |

|                                          |           |                   |                           |                 |       |
|------------------------------------------|-----------|-------------------|---------------------------|-----------------|-------|
| Anti-human CD16<br>Brilliant Violet 785™ | 3G8       | Mouse monoclonal  | Biolegend                 | 302045          | FC    |
| Anti-human CD19 PE-<br>Cy7               | HIB19     | Mouse monoclonal  | eBioscience™              | 25-0199-42      | FC    |
| Anti-human CD19<br>APC                   | HIB19     | Mouse monoclonal  | BD Pharmingen             | 555415          | FC    |
| Anti-human CD20<br>APC                   | 2H7       | Mouse monoclonal  | BioLegend                 | 302309          | FC    |
| Anti-human CD25<br>FITC                  | M-A251    | Mouse monoclonal  | BD Pharmingen             | 555431          | FC    |
| Anti-human CD45<br>V500-C                | 2D1       | Mouse monoclonal  | BD Horizon                | 655873          | FC    |
| Anti-human CD45<br>Alexa Fluor® 700      | HI30      | Mouse monoclonal  | BD Pharmingen             | 560566          | FC    |
| Anti-human CD45RA<br>V500                | HI100     | Mouse monoclonal  | BD Horizon                | 561640          | FC    |
| Anti-human CD56 PE-<br>Cy7               | NCAM16.2  | Mouse monoclonal  | BD                        | 335826          | FC    |
| Anti-human CD56<br>APC                   | B159      | Mouse monoclonal  | BD Horizon                | 555518          | FC    |
| Anti-human CCR7<br>BV421                 | 150503    | Mouse monoclonal  | BD Horizon                | 562555          | FC    |
| Anti-human EGFR                          | EGFR.1    | Mouse monoclonal  | BD Horizon                | 566254          | FC    |
| Anti-human HLA-DR<br>PE-Cy7              | G46-6     | Mouse monoclonal  | BD Pharmingen             | 560651          | FC    |
| Anti-human TCRg/d<br>FITC                | 11F2      | Mouse monoclonal  | BD                        | 347903          | FC    |
| Anti-human TCRA/b<br>PE                  | BW242/412 | Mouse monoclonal  | Miltenyi Biotec           | 130-113-531     | FC    |
| Anti-human CD4<br>Alexa Fluor® 594       | EPR6855   | Rabbit monoclonal | Abcam                     | ab277931        | DSP   |
| Anti-human CD8<br>Alexa Fluor® 647       | C8/144B   | Mouse monoclonal  | Novus<br>Biologicals      | NBP2-34588AF647 | DSP   |
| Anti-His                                 | PentaHis  | Mouse monoclonal  | QIAGEN                    | 34660           | ELISA |
| Anti-mouse IgG (H+L)<br>HRP              | –         | Goat polyclonal   | Jackson<br>ImmunoResearch | 115-035-166     | ELISA |

---

|                                  |      |                  |                 |        |    |
|----------------------------------|------|------------------|-----------------|--------|----|
| Anti-Myc                         | 9E10 | Mouse monoclonal | Merck Millipore | 05-419 | WB |
| Anti-mouse IgG (Fc specific) HRP | –    | Goat polyclonal  | Sigma-Aldrich   | A2554  | WB |

---

IHC, Immunohistochemistry; FC, Flow Cytometry; DSP, Digital Spatial Profiling; ELISA, Enzyme-linked immunosorbent assays; WB, Western blot.

**Table S2. Rest of reagents**

| <b>Antigen</b>                                                       | <b>Brand</b>            | <b>Reference</b>        | <b>Application</b> |
|----------------------------------------------------------------------|-------------------------|-------------------------|--------------------|
| Neutral buffered formalin                                            | Sigma-Aldrich           | HT501128                | IHC                |
| DNP-labeled Alu positive control probe II                            | Ventana, Roche          | 05272041001             | ISH                |
| DAPI                                                                 | Sigma-Aldrich           | D9542-10MG              | FC                 |
| FcR Blocking Reagent, human                                          | Miltenyi Biotec         | 130-059-901             | FC                 |
| LIVE-DEAD Fixable Blue Dead Cell Stain Kit                           | eBioscience             | L34961                  | FC                 |
| LIVE-DEAD Fixable Violet Dead Cell Stain Kit                         | eBioscience             | L34963                  | FC                 |
| Anti-human CD45 - GeoMx Solid Tumor TME Morphology marker            | NanoString Technologies | GMX-PRO-MORPH-HST-12    | DSP                |
| Anti-human PanCk - GeoMx Solid Tumor TME Morphology marker           | NanoString Technologies | GMX-PRO-MORPH-HST-12    | DSP                |
| SYTO 13 Nucleic Acid Stain - GeoMx Solid Tumor TME Morphology marker | NanoString Technologies | GMX-PRO-MORPH-HST-12    | DSP                |
| GeoMx protein Slide prep kit PCLN                                    | NanoString Technologies | 121300312               | DSP                |
| GeoMx Immune Cell Profiling Panel                                    | NanoString Technologies | GMX-PROCO-NCT-HICP-12   | DSP                |
| GeoMx IO Drug Target Panel                                           | NanoString Technologies | GMX-PROMOD-NCT-HIODT-12 | DSP                |
| GeoMx Immune Activation Status Panel                                 | NanoString Technologies | GMX-PROMOD-NCT-HIAS-12  | DSP                |
| GeoMx Hyb Code Pack Protein                                          | NanoString Technologies | GMX-PRO-HYB-96          | DSP                |
| nCounter Master Kit                                                  | NanoString Technologies | NAA-AKIT-012            | DSP                |
| Image-iT™ Fixative Solutions                                         | Invitrogen™             | FB002                   | DSP                |
| Citrate Buffer, pH 6.0, 10x, Antigen Retriever                       | Sigma-Aldrich           | C9999                   | DSP                |
| TintoRetriever Pressure Cooker                                       | Bio SB                  | 7008                    | DSP                |
| EGFR Fc chimera protein                                              | R&D Systems             | 344-ER                  | ELISA              |
| Nunc MaxiSorp™                                                       | ThermoFisher Scientific | M9410-1CS               | ELISA              |
| Tween®20                                                             | Sigma-Aldrich           | P1379                   | ELISA              |
| Tetramethylbenzidine                                                 | Sigma-Aldrich           | T0440                   | ELISA              |
| Novex™ WedgeWell™ 10–20% Tris-glycine gels                           | Invitrogen™             | XP10202BOX              | WB                 |
| Immobilon-PVDF Transfer Membrane                                     | Merck Millipore         | IPVH00010               | WB                 |
| Pierce™ ECL Plus Western Blotting Substrate                          | ThermoFisher Scientific | 32132                   | WB                 |



---

|                                    |               |          |     |
|------------------------------------|---------------|----------|-----|
| QIAamp DNA Blood Mini Kit          | QIAGEN        | 50951104 | NGS |
| FFPE RNA/DNA Purification Plus Kit | Norgen Biotek | 54300    | NGS |
| SuperPlex™ Premix                  | Takara        | 638543   | NGS |

---

IHC, Immunohistochemistry; ISH, *In situ* hybridization; FC, Flow Cytometry; DSP, Digital Spatial Profiling; ELISA, Enzyme-linked immunosorbent assays; WB, Western blot.

**Table S3. TCR $\beta$  statistics**

| Patient | Sample        | Total queries | Total unique clonotypes | Total reads assigned to unique clonotypes | Total unique productive clonotypes | Total reads assigned to unique productive clonotypes | Total unique productive clonotypes with 5-20 aa CDR3 | Total reads assigned to unique productive clonotypes with 5-20 aa CDR3 | Shannon Index, H | Gini-Simpson Index, D | Pielou's Evenness, J | Clonality score, C |
|---------|---------------|---------------|-------------------------|-------------------------------------------|------------------------------------|------------------------------------------------------|------------------------------------------------------|------------------------------------------------------------------------|------------------|-----------------------|----------------------|--------------------|
| P1      | Primary tumor | 186,710       | 3,586                   | 6,684                                     | 487                                | 753                                                  | 215                                                  | 389                                                                    | 4.702            | 0.971                 | 0.876                | 0.124              |
|         | Pre-REP       | 57,164        | 2,084                   | 20,200                                    | 488                                | 12,204                                               | 295                                                  | 12,085                                                                 | 0.772            | 0.185                 | 0.136                | 0.864              |
|         | REP           | 131,062       | 3,171                   | 68,505                                    | 720                                | 49,020                                               | 355                                                  | 48,733                                                                 | 0.447            | 0.106                 | 0.076                | 0.924              |
| P2      | Primary tumor | 639,696       | 13,166                  | 42,613                                    | 2,760                              | 6,809                                                | 1,532                                                | 3,597                                                                  | 5.931            | 0.977                 | 0.809                | 0.191              |
|         | Pre-REP       | 320,404       | 10,625                  | 53,727                                    | 2,839                              | 13,776                                               | 1,596                                                | 11,896                                                                 | 4.237            | 0.884                 | 0.574                | 0.426              |
|         | REP           | 462,332       | 3,096                   | 286,422                                   | 1,913                              | 209,019                                              | 1,190                                                | 209,005                                                                | 1.529            | 0.595                 | 0.216                | 0.784              |

P1, patient 1; P2, patient 2; REP, rapid expansion protocol; aa, amino acid. Shannon's and Gini-Simpson's indexes, Pielou's Evenness and Clonality scores were calculated from total number of productive clonotypes with CDR3 size between 5-20 aa.
